# Supplementary material for: Regulation of the IGF1 signaling pathway is involved in idiopathic pulmonary fibrosis induced by alveolar epithelial cell senescence and core fucosylation
Source: publisher site journal article supplement (doi:10.18632/aging.203335), 2021-07-30
Supplement: Supplementary file [file aging-v13i14-203335-supplementary-material-SD1.pdf]

SUPPLEMENTARY FIGURES

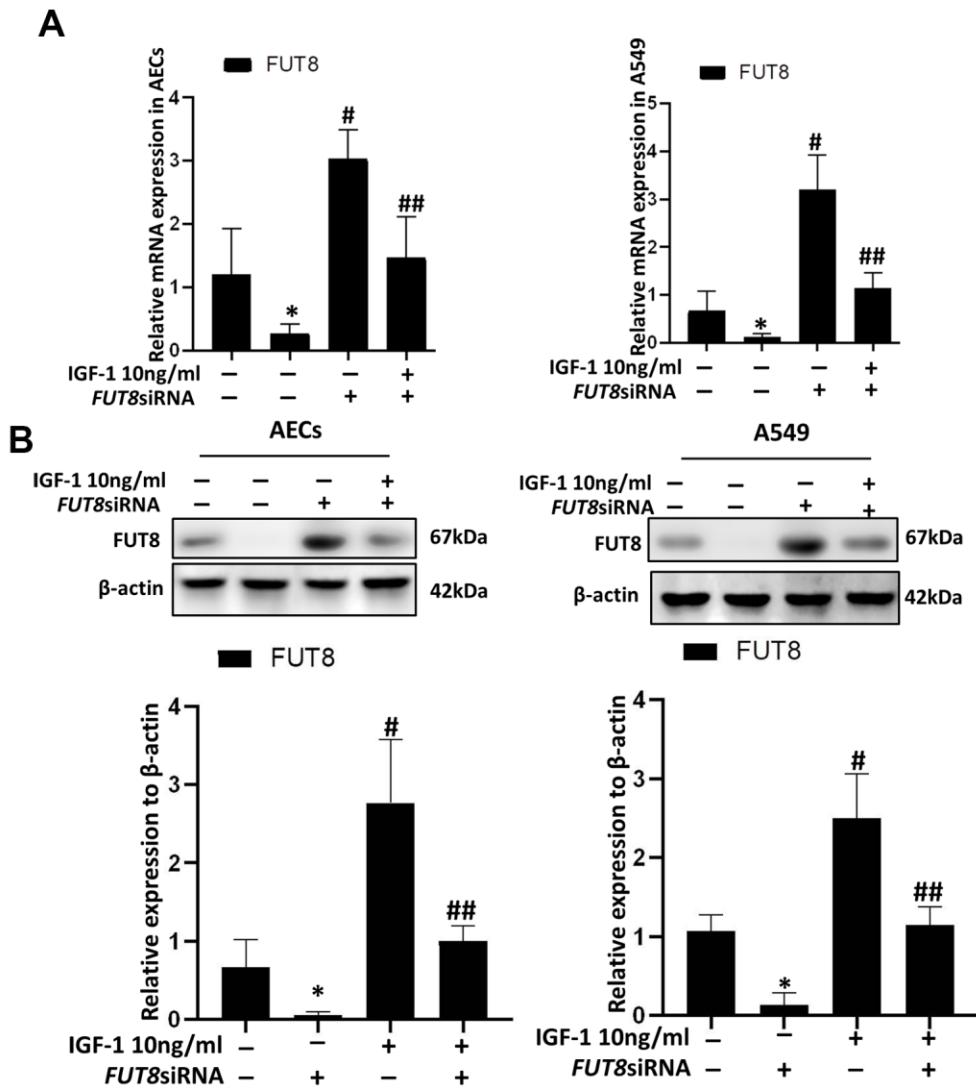

**Supplementary Figure 1. Effect of FUT8siRNA transfection on core fucosylation in AECs and A549 cells.** (A) RT-PCR indicate that FUT8siRNA inhibited the mRNA of endogenous FUT8. (B) Western blotting indicate that FUT8siRNA inhibited the protein expression of endogenous FUT8. Data are shown as the mean  $\pm$  SEM,  $n \geq 3$  per group. \* $P < 0.01$ , # $P < 0.01$ , ## $P < 0.01$ . \*Indicates the comparison of the FUT8siRNA group with control group; # indicates the comparison of the control group with the IGF1 group; ## indicates the comparison of the FUT8 siRNA+ IGF1 group with the IGF1 group. One-way ANOVA followed by Dunnett's Multiple Comparison Test.

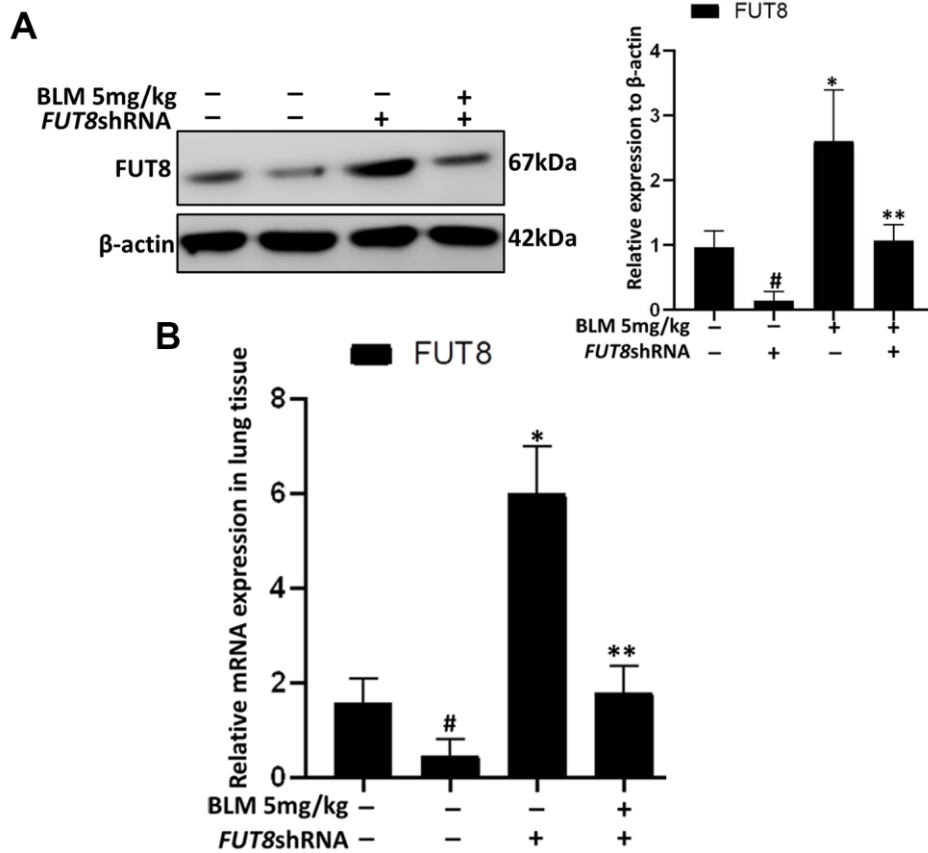

**Supplementary Figure 2. *FUT8*shRNA effectively inhibits endogenous  $\alpha$ -1,6 fucosyltransferase (*FUT8*) expression in the lung tissues.** (A) Representative RT-PCR analysis of *FUT8* mRNA expression in the BLM induced mouse model lung infected with *FUT8*shRNA. (B) Representative western blot analysis and quantification of *FUT8* protein expression in the BLM induced mouse model lung infected with *FUT8*shRNA. Data are shown as the mean  $\pm$  SEM,  $n \geq 3$  per group. # $P < 0.01$ , \* $P < 0.01$ , \*\* $P < 0.01$ . # Indicates the comparison of the *FUT8*shRNA with control group; \* indicates the comparison of the control group with the BLM group; ## indicates the comparison of the *FUT8*shRNA+BLM group with the BLM group. One-way ANOVA followed by Dunnett's Multiple Comparison Test.
